# Supplementary material for: Vertical characterization of aerosol optical properties and brown carbon in winter in urban Beijing, China
Source: Copernicus journal article supplement (doi:10.5194/acp-19-165-2019), 2019-01-04
Supplement: Supplementary file 1 [file acp-19-165-2019-supplement.pdf]

Supplement of Atmos. Chem. Phys., 19, 165–179, 2019  
<https://doi.org/10.5194/acp-19-165-2019-supplement>  
© Author(s) 2019. This work is distributed under  
the Creative Commons Attribution 4.0 License.

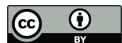

*Supplement of*

## **Vertical characterization of aerosol optical properties and brown carbon in winter in urban Beijing, China**

**Conghui Xie et al.**

*Correspondence to:* Yele Sun ([sunyele@mail.iap.ac.cn](mailto:sunyele@mail.iap.ac.cn))

The copyright of individual parts of the supplement might differ from the CC BY 4.0 License.

**Table S1.** A summary of continuous vertical measurements in this study.

| Number | Height (m) | Date       | Up starting time | Up ending time | Down starting time  | Down ending time    |
|--------|------------|------------|------------------|----------------|---------------------|---------------------|
| 1      | 260        | 11-25-2016 | 15:26:30         | 15:56:42       | 16:10:10            | 16:47:30            |
| 2      | 240        | 11-25-2016 | 18:47:25         | 19:12:08       | 19:22:25            | 19:46:38            |
| 3      | 240        | 11-25-2016 | 23:16:44         | 23:41:26       | 23:51:53            | (11-26)<br>00:16:07 |
| 4      | 240        | 11-26-2016 | 04:26:43         | 04:51:26       | 05:02:14            | 05:26:32            |
| 5      | 260        | 11-26-2016 | 08:31:33         | 08:58:08       | 09:09:32            | 09:35:46            |
| 6      | 260        | 11-26-2016 | 13:27:17         | 13:54:05       | 14:04:47            | 14:31:03            |
| 7      | 260        | 11-30-2016 | 12:09:46         | 12:36:31       | 12:46:58            | 13:13:15            |
| 8      | 260        | 11-30-2016 | 15:00:58         | 15:27:40       | 15:40:36            | 16:06:46            |
| 9      | 200        | 11-30-2016 | 20:01:27         | 20:22:30       | 20:32:41            | 20:53:14            |
| 10     | 260        | 12-01-2016 | 08:09:22         | 08:36:02       | 08:46:24            | 09:12:55            |
| 11     | 260        | 12-01-2016 | 11:29:38         | 11:54:15       | 12:04:18            | 12:30:30            |
| 12     | 260        | 12-01-2016 | 14:55:15         | 15:21:55       | 15:31:35            | 15:57:46            |
| 13     | 240        | 12-01-2016 | 18:51:02         | 19:15:39       | 19:28:00            | 19:52:13            |
| 14     | 240        | 12-01-2016 | 23:19:12         | 23:43:53       | (12-02)<br>00:01:28 | (12-02)<br>00:25:06 |
| 15     | 240        | 12-02-2016 | 06:07:23         | 06:32:02       | 06:42:54            | 07:06:10            |
| 16     | 260        | 12-02-2016 | 09:10:43         | 09:37:22       | 09:51:43            | 10:17:54            |
| 17     | 260        | 12-02-2016 | 14:33:48         | 15:00:30       | 15:10:24            | 15:36:34            |
| 18     | 240        | 12-02-2016 | 19:34:42         | 19:59:19       | 20:10:34            | 20:34:45            |
| 19     | 240        | 12-03-2016 | 00:26:58         | 00:51:50       | 01:18:38            | 01:42:56            |
| 20     | 240        | 12-03-2016 | 06:05:06         | 06:29:43       | 06:40:45            | 07:04:59            |
| 21     | 260        | 12-03-2016 | 10:29:54         | 10:56:20       | 11:06:39            | 11:32:43            |
| 22     | 260        | 12-03-2016 | 15:45:28         | 16:12:10       | 16:22:45            | 16:49:04            |
| 23     | 240        | 12-03-2016 | 20:57:41         | 21:22:13       | 21:33:47            | 21:58:03            |
| 24     | 240        | 12-04-2016 | 02:05:38         | 02:30:20       | 02:38:48            | 03:03:03            |
| 25     | 260        | 12-04-2016 | 07:30:57         | 07:57:37       | 08:10:47            | 08:37:00            |

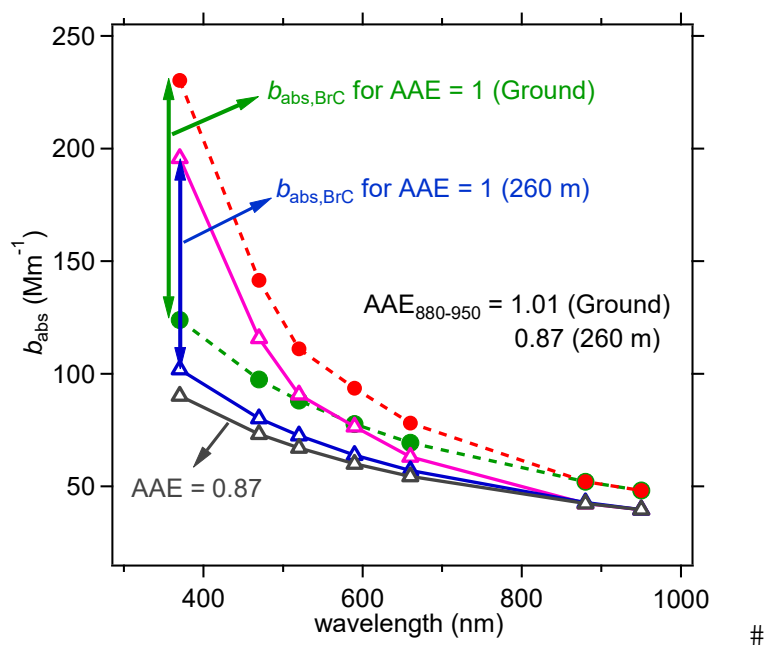

**Figure S1.** Measured  $b_{\text{abs}}$  at ground (red dots) and 260 m (pink triangles) as a function of wavelengths. Estimation of  $b_{\text{abs}}$  for pure BC are also shown with the assumption that AAE equal to 1 and values derived from  $b_{\text{abs}}$  at 880 and 950 nm.

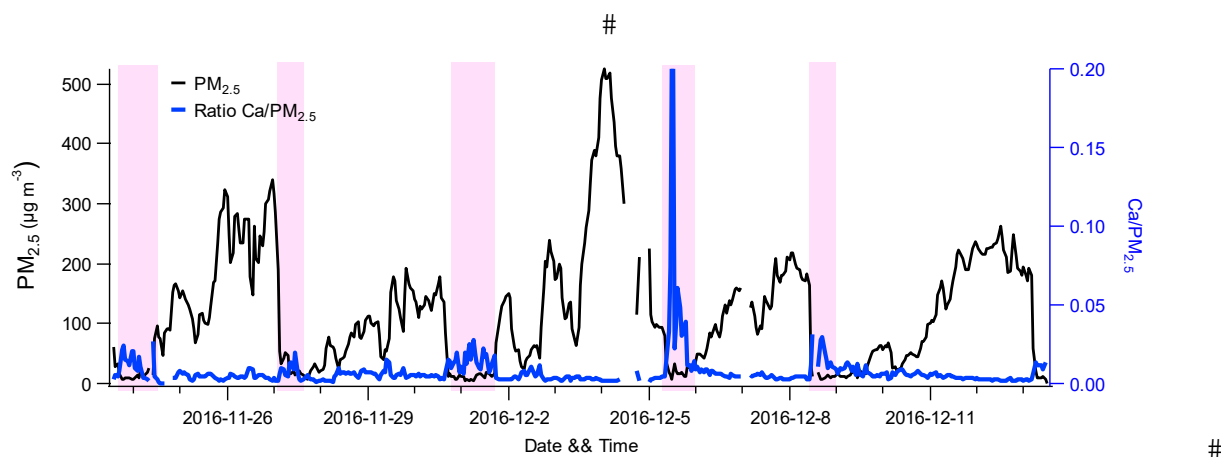

**Figure S2.** Time series of  $\text{PM}_{2.5}$  and Ca content during this study. The periods with high  $\text{Ca}/\text{PM}_{2.5}$  (shaded areas) are excluded when calculating the absorption and AAE of BrC.

#

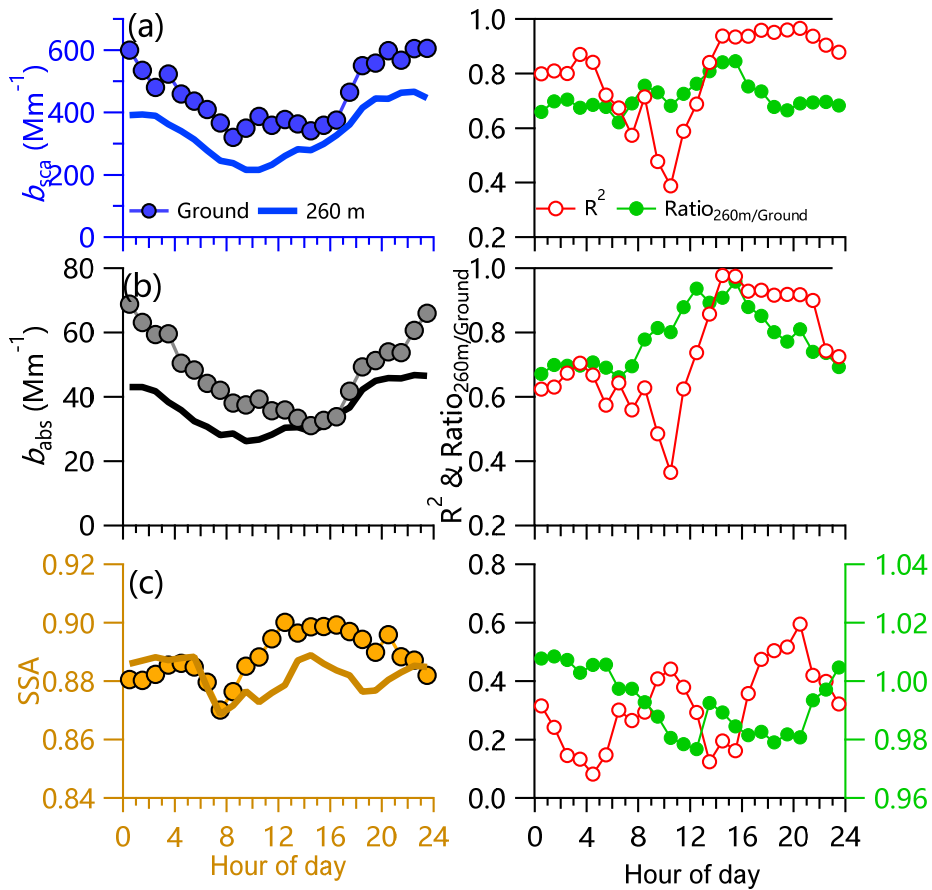

**Figure S3.** Diurnal cycles of (a)  $b_{sca}$ , (b)  $b_{abs}$ , and (c) SSA at 260 m and ground level for the entire study. Right panel shows the diurnal cycles of correlation coefficients ( $R^2$ ) and ratio<sub>260m/ground</sub> for  $b_{sca}$ ,  $b_{abs}$ , and SSA.#

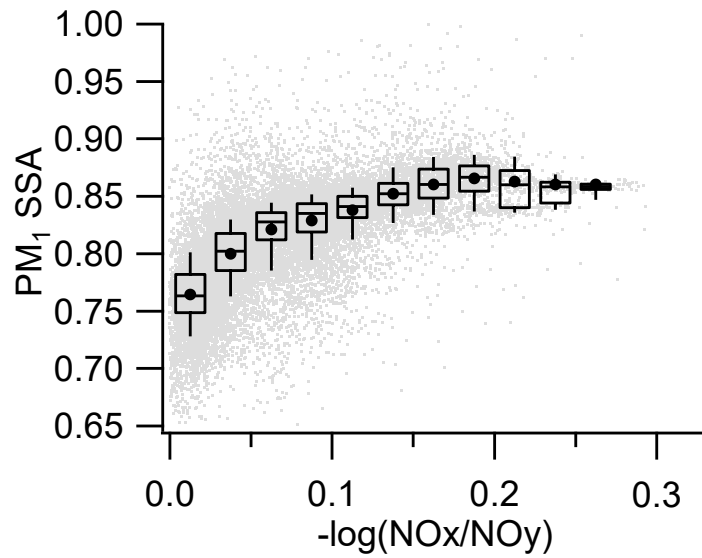

**Figure S4.** Single scattering albedo of PM<sub>1</sub> as a function of  $-\log(\text{NO}_x/\text{NO}_y)$ . The solid circles and horizontal lines are mean and median values, respectively. The bottom and top of the box are 25<sup>th</sup> and 75<sup>th</sup> percentiles, and the bottom and top whiskers are 10<sup>th</sup> and 90<sup>th</sup> percentiles.

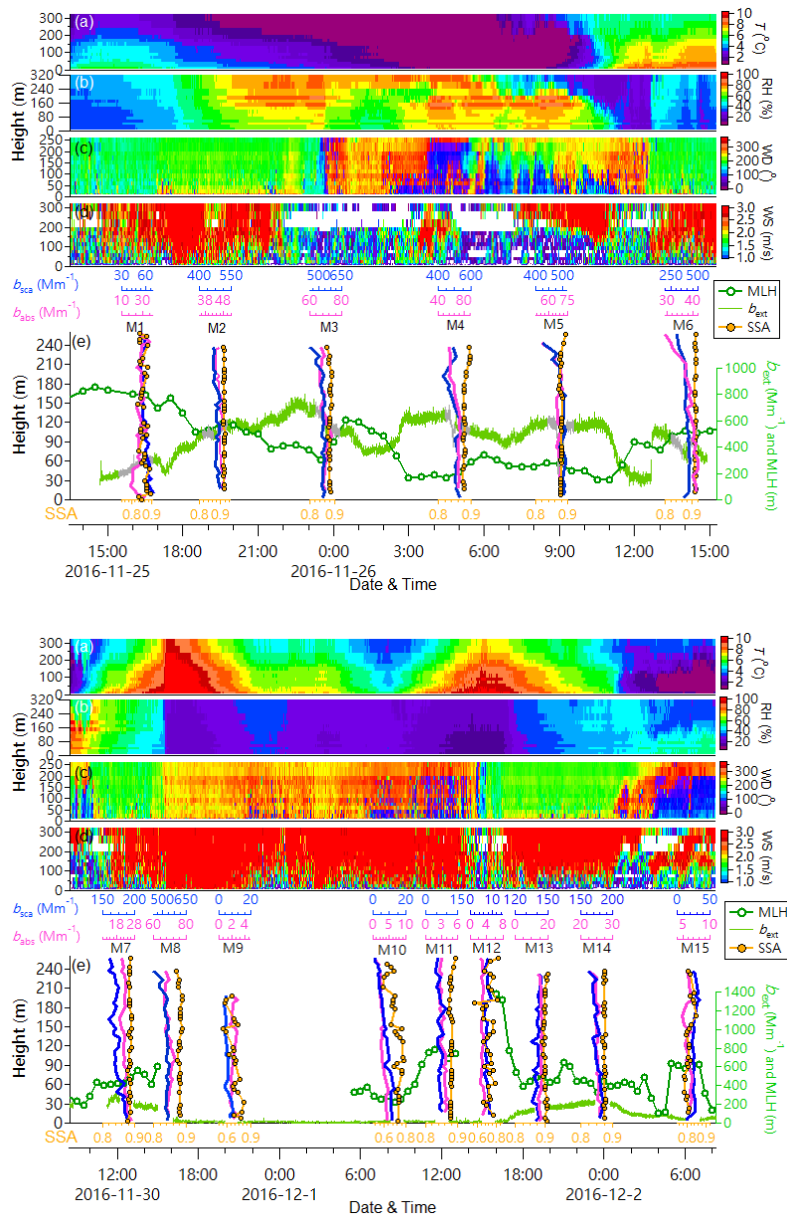

**Figure S5.** Evolution of vertical profiles of  $b_{sca}$ ,  $b_{abs}$  and SSA during 25-26 November (top) and during 30 November – 2 December (bottom). Also shown are (a-d) meteorological variable of  $T$ , RH, WD, and WS, and (e) time series of  $b_{ext}$  at ground and MLH. M1-M15 refer to the number of measurements.

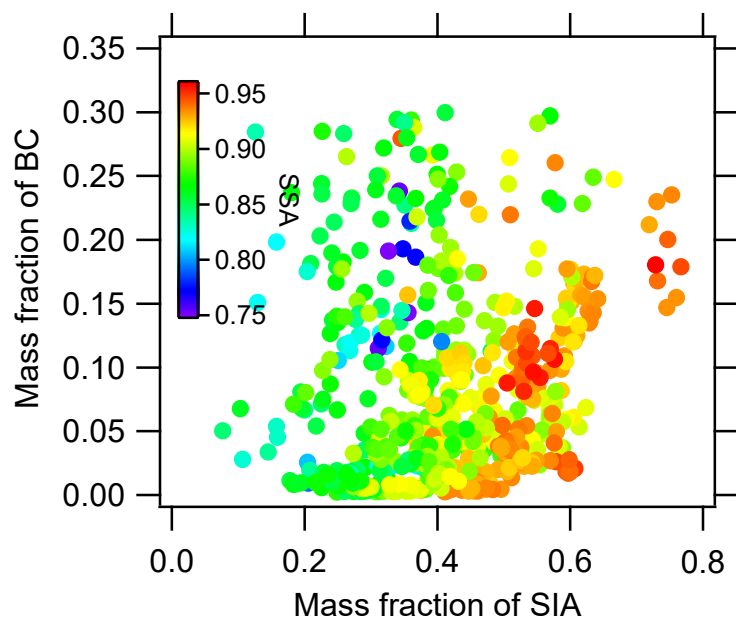

**Figure S6.** Relationship between mass fraction of BC and secondary inorganic aerosol (SIA) in PM<sub>1</sub>, colored by SSA.

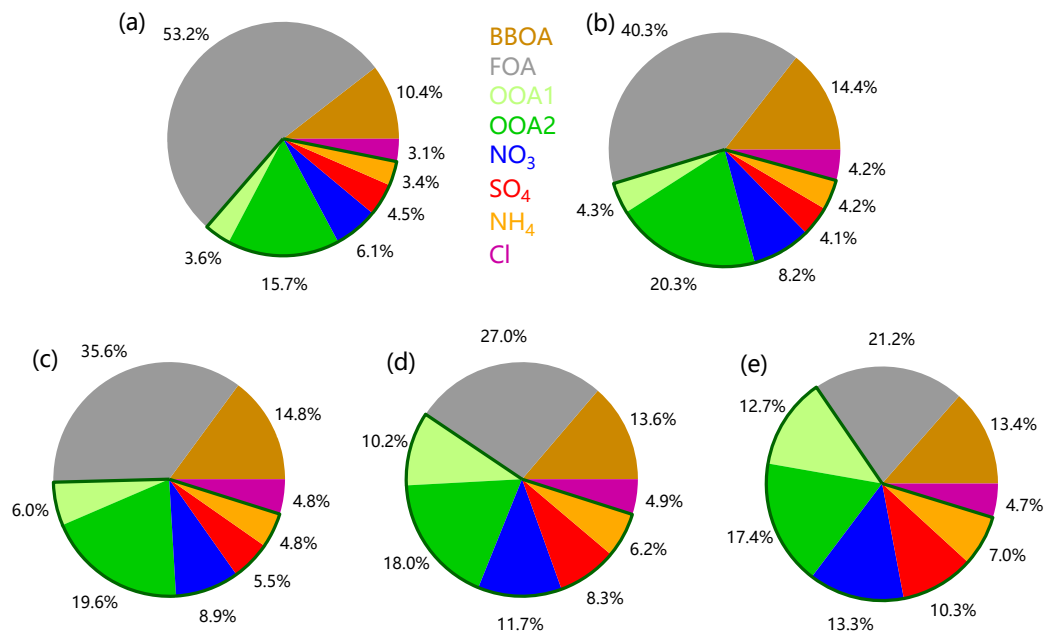

**Figure S7.** Composition of *r*BC coatings during different PM<sub>1</sub> levels: (a) < 50 µg m<sup>-3</sup>, (b) 50 – 100 µg m<sup>-3</sup>, (c) 100 – 150 µg m<sup>-3</sup>, (d) 150 – 200 µg m<sup>-3</sup>, (e) 200 – 250 µg m<sup>-3</sup>.



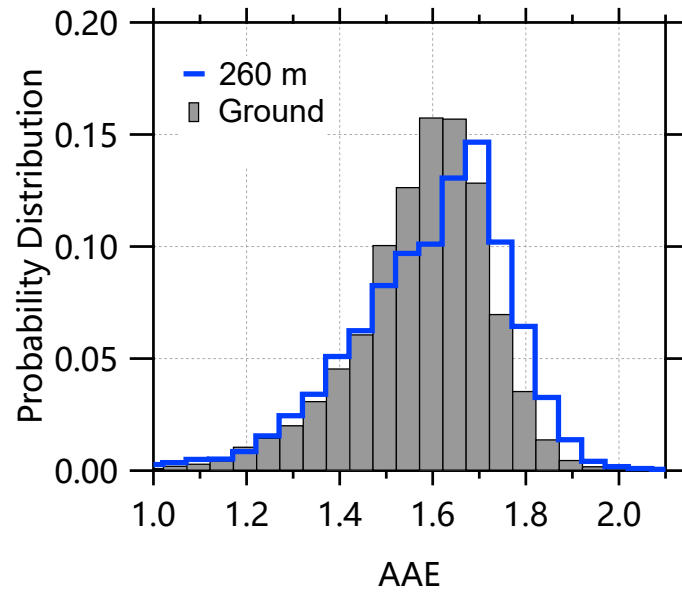

**Figure S8.** Probability distribution of absorption angstrom exponent (AAE) at ground level and at 260 m.#

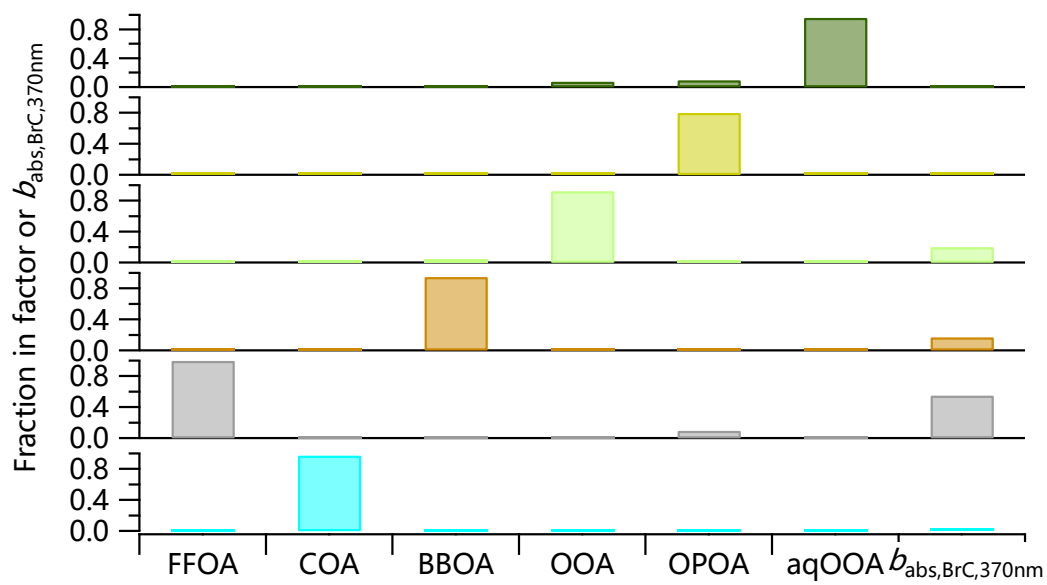

**Figure S9.** Factor profiles and the corresponding absorption apportionment analysis.
